# Supplementary material for: The PDZ Protein Canoe/AF-6 Links Ras-MAPK, Notch and Wingless/Wnt Signaling Pathways by Directly Interacting with Ras, Notch and Dishevelled
Source: PubMed Central journal article supplement (PMC1762375; doi:10.1371/journal.pone.0000066), 2006-12-20

## Supporting Figure 4

diP-MAPK/Eve

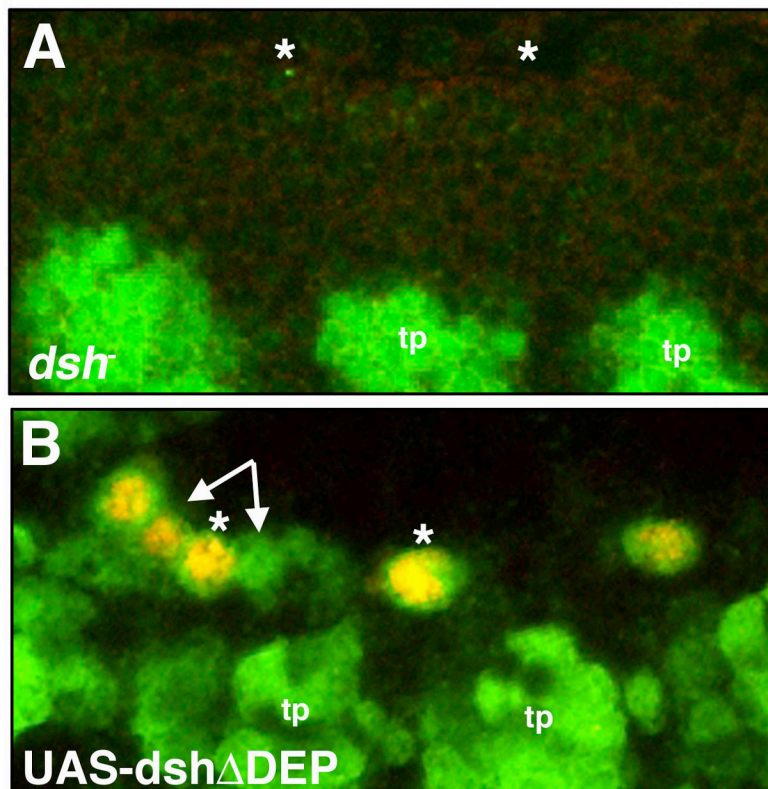

Supplement: pone.0000066.s004.pdf [file pone.0000066.s004.pdf]
